# Supplementary material for: Biotoxic and Cytotoxic Effects of Occupational Pesticides in the Buccal cells of Sudanese Farmers
Source: Research Square preprint supplement (doi:10.21203/rs.3.rs-7919116/v1), 2025-11-11
Supplement: Supplementary file 1 [file 14986d290ac56e98d4619972.docx]

# Tables

**Table (1): Exposure characteristics of farmers to pesticides.**

| Parameters | Exposure to pesticides/ Year | period between spraying times/Days | Last time being exposed/Day |
| --- | --- | --- | --- |
| Mean | 13.04 | 8.02 | 10.48 |
| Std. Deviation | 11.462 | 3.600 | 10.782 |
| Minimum | 1 | 2 | 1 |
| Maximum | 50 | 20 | 45 |

**Table (2): The frequency of the Micronuclei and other nuclear abnormalities among cases and controls.**

| Parameter | Name | Mean | Std. Deviation | P. Value |
| --- | --- | --- | --- | --- |
| Micro nucleated cell | Case | 4.90 | 2.288 | 0.000 |
| Control | 1.64 | 1.394 |
| Total Micronuclei | Case | 6.14 | 3.938 | 0.000 |
| Control | 2.10 | 1.805 |
| Binucleated | Case | 1.60 | 1.498 | 0.948 |
| Control | 1.62 | 1.306 |
| Karyorehxsis | Case | 6.98 | 6.876 | 0.000 |
| Control | 2.07 | 2.522 |
| Karyolysis | Case | 3.58 | 4.204 | 0.000 |
| Control | 0.79 | 1.371 |
